# Supplementary material for: Molecular Characterization and Efficacy Evaluation of Transgenic Maize Harboring cry2Ab-vip3A-cp4epsps for Insect Resistance and Herbicide Tolerance
Source: MDPI journal article supplement (doi:10.3390/plants12030612), 2023-01-30
Supplement: s1 [file s1]

## Supplementary Materials:

Table S1 Primers used in this study

| Primer name | Primer sequence (5'-3') | Purpose                                                          |
|-------------|-------------------------|------------------------------------------------------------------|
| T35LBfw2    | TAATGTGTGAGTAGTTCCCAG   | PCR identification of LB terminal flanking sequences of CVC-1    |
| CVC1LB-1    | CGTACGAGTATTCGCTGTAG    |                                                                  |
| NOsRBfw2    | AGAGTCCCGCAATTATACAT    | PCR identification of RB terminal flanking sequences of CVC-1    |
| CVC1RB-1    | TTCTTCCCGACAGCCAACAA    |                                                                  |
| T35LBfw2    | TAATGTGTGAGTAGTTCCCAG   | Sequencing validation of LB terminal flanking sequences of CVC-1 |
| CVC1LB-2    | ACATCAGTCGAAACGGCATC    |                                                                  |
| NOsRBfw2    | AGAGTCCCGCAATTATACAT    | Sequencing validation of RB terminal flanking sequences of CVC-1 |
| CVC1RB-2    | TGCTGGTCACTCTCTTTGCA    |                                                                  |
| T35LBfw1    | GCTCATGTGTTGAGCATATAA   | PCR identification of LB terminal flanking sequences of CVC-2    |
| CVC2LB-1    | AGAGTAGGAGATGGAATGGAAT  |                                                                  |
| NOsRBfw2    | AGAGTCCCGCAATTATACAT    | PCR identification of RB terminal flanking sequences of CVC-2    |
| CVC2RB-1    | ACGGTTACGGCAGCTAACT     |                                                                  |
| T35LBfw2    | TAATGTGTGAGTAGTTCCCAG   | Sequencing validation of LB terminal flanking sequences of CVC-2 |
| CVC2LB-2    | ATGGCTCTTTCCGCTACCT     |                                                                  |
| NOsRBfw2    | AGAGTCCCGCAATTATACAT    | Sequencing validation of RB terminal flanking sequences of CVC-2 |
| CVC2RB-2    | CACGCTGTCTAGGACAGAAA    |                                                                  |
| CP4-F       | CTCAATGGCGTGGATTGCGAT   | PCR identification of <i>cp4epsps</i> gene                       |
| CP4-R       | CAGCCTTCGTATCGGAGAGTT   |                                                                  |
| Cry2Ab-F    | ACCGTCACCAACTGGCAGAC    | PCR identification of <i>cry2Ab</i> gene                         |
| Cry2Ab-R    | GGAGTCGCCCTGGTTGCCG     |                                                                  |
| Vip3A-F     | GACTACCAGACCATCAACAA    | PCR identification of <i>vip3A</i> gene                          |
| Vip3A-R     | TTGATGCTCACGTCGTAGAA    |                                                                  |
| qZmUbi2F    | TGGTTGTGGCTTCGTTGGTT    | Reference gene, qRT-PCR                                          |
| qZmUbi2R    | GCTGCAGAAGAGTTTTGGGTACA |                                                                  |
| Cry2Ab-F    | ACCGTCACCAACTGGCAGAC    | <i>cry2Ab</i> , qRT-PCR                                          |
| qCry2Ab-R   | TTGTAGTGCAGTGGACGGCGG   |                                                                  |
| qVip3A-F    | AGGCGTTCCTGACCCTGAC     | <i>vip3A</i> , qRT-PCR                                           |
| qVip3A-R    | TCATCTTCGCGTCCTCGTCG    |                                                                  |
| qCP4-F      | ACCCATCTCGATACCCGCAT    | <i>cp4epsps</i> , qRT-PCR                                        |
| CP4-R       | CAGCCTTCGTATCGGAGAGTT   |                                                                  |
